# Supplementary material for: Biosensors Platform Based on Chitosan/AuNPs/Phthalocyanine Composite Films for the Electrochemical Detection of Catechol. The Role of the Surface Structure
Source: PubMed Central journal article supplement (PMC7181025; doi:10.3390/s20072152), 2020-04-10
Supplement: sensors-20-02152-s001.pdf [file sensors-20-02152-s001.pdf]

Supplementary Material

# Biosensors Platform Based on Chitosan/AuNPs/Phthalocyanine Composite Films for the Electrochemical Detection of Catechol. The Role of the Surface Structure

Coral Salvo-Comino <sup>1,2</sup>, Alfonso González-Gil <sup>1</sup>, Javier Rodríguez-Valentín <sup>1,3</sup>, Celia García-Hernández <sup>1,2</sup>, Fernando Martín-Pedrosa <sup>2,3</sup>, Cristina García-Cabezón <sup>2,3</sup> and María Luz Rodríguez-Méndez <sup>1,2,\*</sup>

<sup>1</sup> Group UVASENS, Escuela de Ingenierías Industriales, Universidad de Valladolid, Paseo del Cauce, 59, 47011 Valladolid, Spain; coraldeugena@gmail.com (C.S.-C.); alfonsogoninf@gmail.com (A.G.-G.); javrova@gmail.com (J.R.-V.); celiagarcihernandez@gmail.com (C.G.-H.)

<sup>2</sup> Bioeco UVA Research Institute, Universidad de Valladolid, 47011 Valladolid, Spain; fmp@eii.uva.es (F.M.-P.); crigar@eii.uva.es (C.G.-C.)

<sup>3</sup> Dpt. of Materials Science, Universidad de Valladolid, Paseo del Cauce, 59, 47011 Valladolid, Spain

\* Correspondence: mluz@eii.uva.es; Tel.: +34-983-423540; Fax: +34-983-423310

Received: 16 March 2020; Accepted: 09 April 2020; Published: date

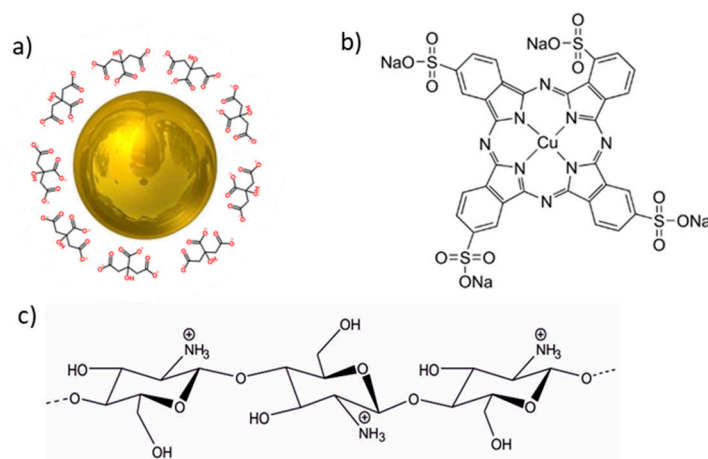

**Figure S1.** Materials used to form the sensing platforms: a) gold nanoparticles (AuNPs) capped with citrate; b) sulfonated copper phthalocyanine (CuPcS); and c) chitosan (CHI).

The AuNPs' size was recalculated following the Mie method, using the following equation:

$$d = \frac{\ln\left(\frac{\lambda_{spr} - \lambda_0}{L_1}\right)}{L_2}$$

where  $\lambda_{spr}$  is the surface plasmon resonance peak position, and  $\lambda_0=512$  nm.  $L_1=6.53$  nm and  $L_2=0.0216$  nm<sup>-1</sup>, are theoretical parameters when  $d$  is known to be  $d>25$  nm. The  $\lambda_{spr}$  value of 533 nm was determined from the absorbance spectrum shown below. The estimated diameter of the obtained AuNPs is 54 nm.

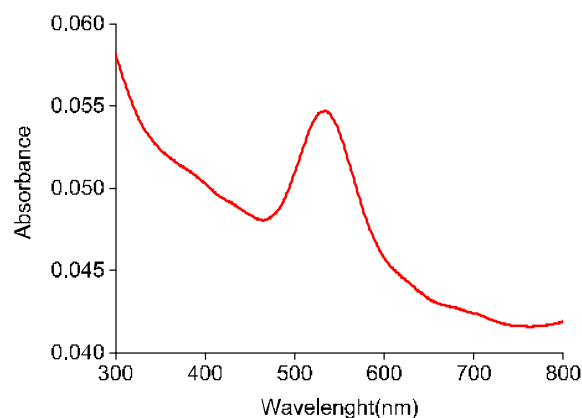

Figure S2. UV-Vis spectrum of AuNP solution.

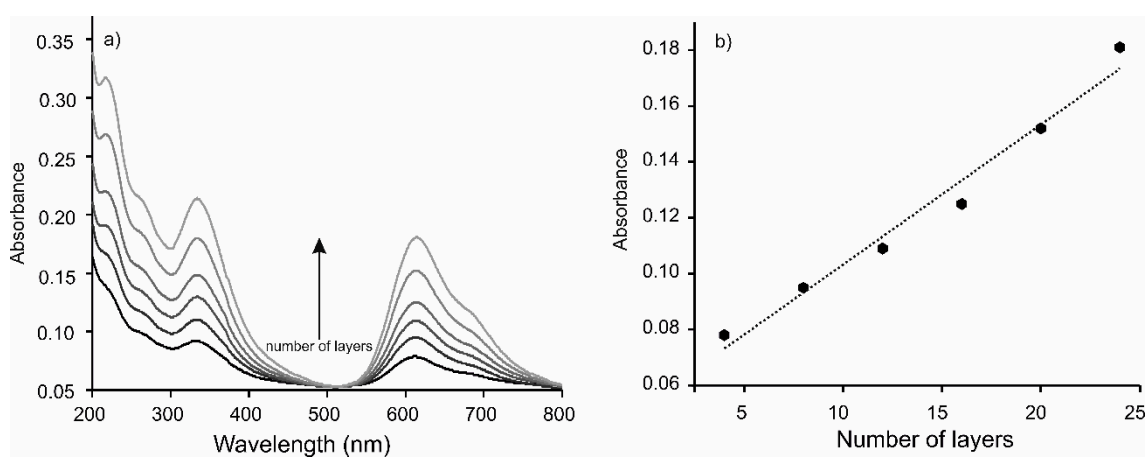

Figure S3. UV-Vis spectra of a) [(CHI)-(AuNPs)-(CHI)-(CuPcS)]<sub>2</sub> LbL films with increasing number of layers (n = 4,8,12,16,20); and b) correlation between the absorbance measured at 615 nm and the number of layers.

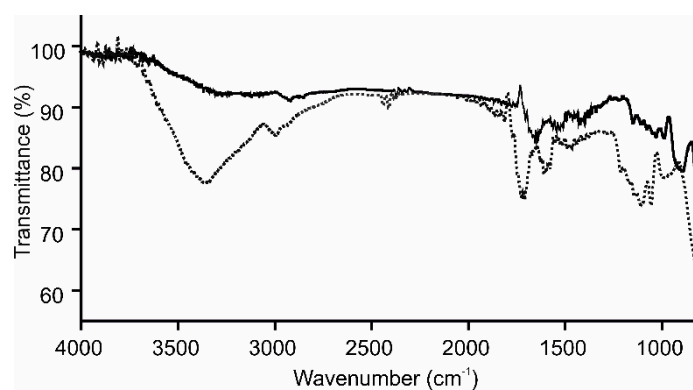

Figure S4. Comparison of the FTIR spectra of the LbL platform [(CHI)-(AuNPs)-(CHI)-(CuPcS)]<sub>2</sub> (solid line) and of the biosensor [(CHI)-(AuNPs)-(CHI)-(CuPcS)]<sub>2</sub>-Lac (dotted line).

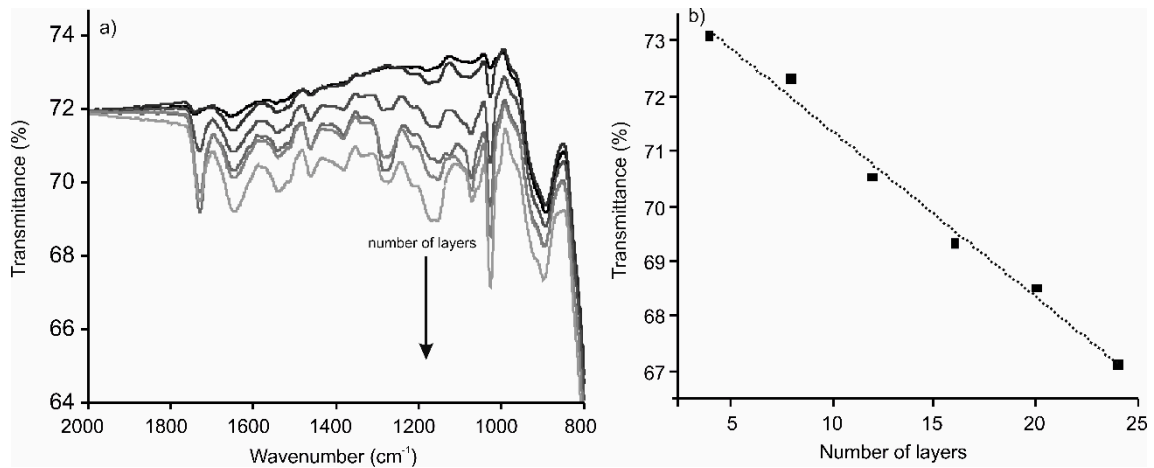

**Figure S5.** a) FTIR spectra of the platform [(CHI)-(AuNPs)-(CHI)-(CuPcS)]<sub>2</sub> with increasing number of layers (n = 4,8,12,16,20,24) and b) correlation between the transmittance measured at 1033 cm<sup>-1</sup> and the number of layers.

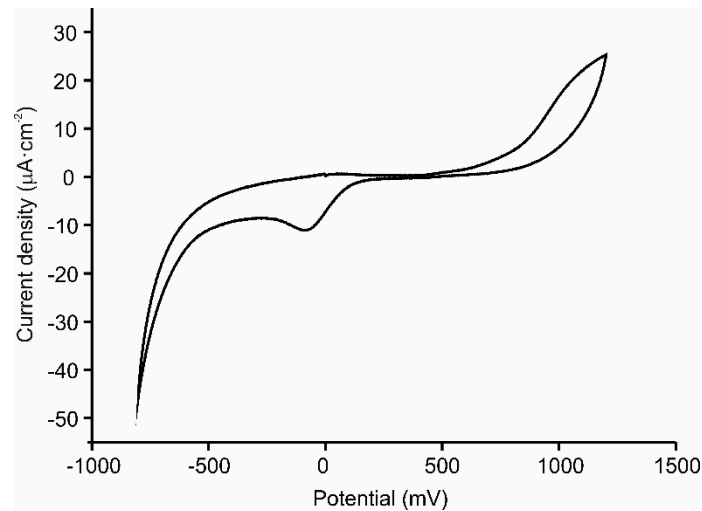

**Figure S6.** CV curves registered in catechol 10<sup>-4</sup> mol·L<sup>-1</sup> in 0.01 M phosphate buffer pH 7 at a bare ITO electrode.

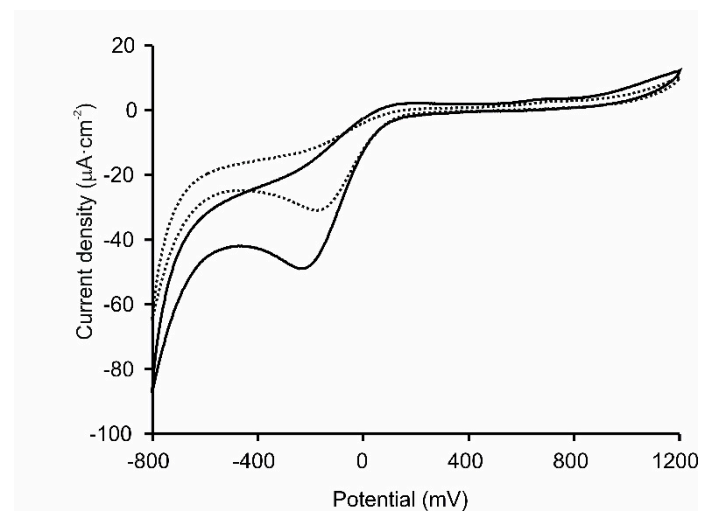

**Figure S7.** CV registered in catechol 10<sup>-4</sup> mol·L<sup>-1</sup> in 0.01 M phosphate buffer pH 7 at [(CHI)-(AuNPs)-(CHI)-(CuPcS)]<sub>2</sub>-Lac electrode, where the enzyme was cross-linked by immersion in glutaraldehyde liquid (dotted line) and exposure to glutaraldehyde vapors (solid line).

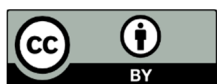

© 2020 by the authors. Submitted for possible open access publication under the terms and conditions of the Creative Commons Attribution (CC BY) license (<http://creativecommons.org/licenses/by/4.0/>).
